# Supplementary material for: Effects of Exogenous L-Asparagine on Poplar Biomass Partitioning and Root Morphology
Source: MDPI journal article supplement (doi:10.3390/ijms232113126), 2022-10-28
Supplement: s1 [file s1]

**Table S1:** List of primer sequences used for qPCR

| Gene            | Forward primer             | Reverse primer            |
|-----------------|----------------------------|---------------------------|
| <i>UBIC</i>     | GATTACCCGGAGAAGCCACC       | GTTGTGTGGTGCTGTCATCT      |
| <i>NR</i>       | AATGCCGAAGCCTGGTGG         | CATGACTCGGCGTCGTTATC      |
| <i>Fd-GOGAT</i> | GTCCAGTCAACGCCACTCTC       | CAAGTTTGCTACCTGCGGTT      |
| <i>AS1</i>      | TGTTGGAAGTTAGTGCTTCGG      | GACAACACACGACTTCAAAGGA    |
| <i>AS2</i>      | ACCAAGGCTGCCAGTCAGAATAA    | CGTACCCTAACTAAAGCGAACGAAA |
| <i>AS3</i>      | GAGGACCGAAGTACATGCC        | CAACAAGGTGCCAACACTACT     |
| <i>ASPG1</i>    | GTAATGGAGATAGCCAAATTGGGACT | CCTTTGCCTGTAGCGGAAACTG    |
| <i>ASPG2</i>    | GCTGCTAACAGTCCCTTGGTA      | ACGTGCTAGTGTCCCTCGTATAA   |
| <i>ASPG3</i>    | TGATGCGCTTCCTTCCATGT       | ATCCATGACAAGCACCAGCA      |
| <i>GS1.1</i>    | ATGGTTGTCTGTCAATTTGTTTGCC  | CCAGCAAGAGTTTTATTTAGATTAG |
| <i>GS1.2</i>    | GGAATTGAGTATTGGAAGATGATGG  | TATGTTCATAAATGATCAACAGCC  |
| <i>GS1.3</i>    | TGGAAACCATAAGAGATCACCACC   | GAAGAGGCAATTCTTGTACCAAG   |
| <i>GS2</i>      | GGAGCATCACTTGGATCTAGATGG   | CAAAACCCAAGAGTAAAAAGGTCC  |
| <i>NiR</i>      | CAAGTTGCCGATATTGGGT        | AAGTCCTTGCATGGAACAC       |
| <i>CWINV1</i>   | TCGTAGACATGGATCCTCGC       | TGCTTGTGAATTGCCAGCTT      |
| <i>VI2</i>      | CAGTTCAAGATCTGGCCACA       | GCAAGCTCGGATGGATAAGC      |
